# Supplementary material for: An Adjuvanted, Tetravalent Dengue Virus Purified Inactivated Vaccine Candidate Induces Long-Lasting and Protective Antibody Responses Against Dengue Challenge in Rhesus Macaques
Source: PubMed Central journal article supplement (PMC4385761; doi:10.4269/ajtmh.14-0268), 2015-04-01
Supplement: SD1.pdf [file SD1.pdf]

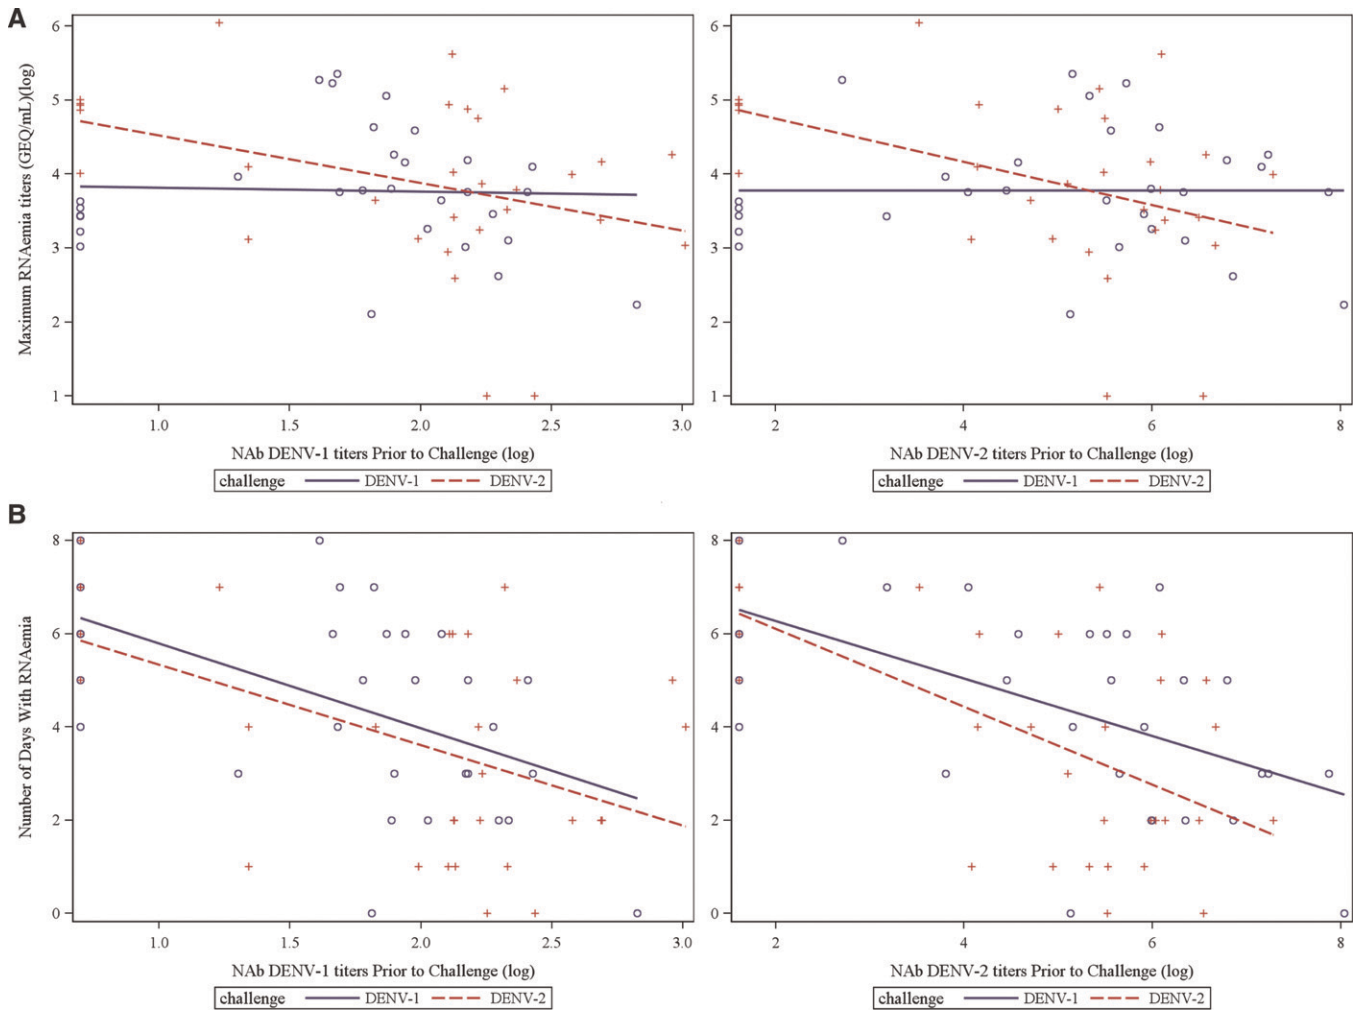

SUPPLEMENTAL FIGURE 1. Regression plots showing the correlation between the log neutralizing antibody (NAb) titers at the day of challenge with dengue virus-1 (DENV-1) or DENV-2 and (A) the maximum RNAemia levels (in genome equivalents [GEO] per 1 mL) post-challenge with DENV-1 or DENV-2 or (B) the duration of RNAemia (number of days with RNAemia exceeding the limit of quantitation).

SUPPLEMENTAL TABLE 1  
Vaccine reactivity: local reactivity during days 0-3 post-vaccination and systemic reactivity during days 0-7 post-vaccination

| Group                   | Study 1    |               |               |               |              |                 |                 |                 |                |      | Study 2 |       |       |       |      |      |
|-------------------------|------------|---------------|---------------|---------------|--------------|-----------------|-----------------|-----------------|----------------|------|---------|-------|-------|-------|------|------|
|                         | 2µg + Alum | 0.5µg + AS01E | 0.5µg + AS05A | 0.5µg + AS04B | 0.5µg + Alum | 0.125µg + AS01E | 0.125µg + AS05A | 0.125µg + AS04B | 0.125µg + Alum | PBS  | AS01E   | AS03A | AS03B | AS03C | Alum | PBS  |
| <i>N</i>                | 4          | 4             | 4             | 4             | 4            | 4               | 4               | 4               | 4              | 4    | 10      | 10    | 10    | 10    | 10   | 10   |
| Age range (years)       | 5-9        | 5-9           | 6-11          | 5-10          | 5-14         | 5-9             | 5-10            | 5-9             | 6-11           | 6-10 | 5-10    | 4-9   | 5-8   | 5-9   | 5-9  | 5-9  |
| Sex ratio (male/female) | 3/1        | 3/1           | 2/2           | 3/1           | 3/1          | 3/1             | 3/1             | 2/2             | 3/1            | 3/1  | 4/6     | 1/9   | 5/5   | 6/4   | 7/3  | 7/3  |
| Weight (kg)             | 7-9        | 7-10          | 6-10          | 8-11          | 8-11         | 6-13            | 5-10            | 6-8             | 7-10           | 7-11 | 6-12    | 5-12  | 5-13  | 5-16  | 6-14 | 6-14 |
| Local                   |            |               |               |               |              |                 |                 |                 |                |      |         |       |       |       |      |      |
| Post-dose 1             |            |               |               |               |              |                 |                 |                 |                |      |         |       |       |       |      |      |
| Redness and bruising    |            |               |               |               |              |                 |                 |                 |                |      |         |       |       |       |      |      |
| All                     | 1          | 1             | 4             | 5             | 5            | 5               | 1               | 1               | 4              | 3    | 6       | 1     | 0     | 0     | 0    | 0    |
| Grade 1                 | 1          | 1             | 4             | 5             | 5            | 5               | 1               | 1               | 1              | 3    | 4       | 0     | 0     | 0     | 0    | 0    |
| Grade 2                 | 0          | 0             | 0             | 0             | 0            | 0               | 0               | 0               | 0              | 0    | 2       | 1     | 0     | 0     | 0    | 0    |
| Grade 3                 | 0          | 0             | 0             | 0             | 0            | 0               | 0               | 0               | 0              | 0    | 0       | 0     | 0     | 0     | 0    | 0    |
| Induration              |            |               |               |               |              |                 |                 |                 |                |      |         |       |       |       |      |      |
| All                     | 0          | 0             | 1             | 2             | 0            | 1               | 1               | 0               | 0              | 2    | 6       | 0     | 3     | 8     | 4    | 1    |
| Grade 1                 | 0          | 0             | 1             | 0             | 0            | 0               | 0               | 0               | 0              | 0    | 0       | 0     | 0     | 0     | 0    | 0    |
| Grade 2                 | 0          | 0             | 1             | 2             | 0            | 1               | 1               | 0               | 0              | 2    | 1       | 0     | 2     | 8     | 4    | 1    |
| Grade 3                 | 0          | 0             | 0             | 0             | 0            | 0               | 0               | 0               | 0              | 0    | 5       | 0     | 1     | 0     | 0    | 0    |
| Swelling                |            |               |               |               |              |                 |                 |                 |                |      |         |       |       |       |      |      |
| All                     | 0          | 0             | 1             | 0             | 0            | 1               | 0               | 0               | 0              | 0    | 1       | 0     | 0     | 1     | 0    | 0    |
| Grade 1                 | 0          | 0             | 0             | 0             | 0            | 0               | 0               | 0               | 0              | 0    | 0       | 0     | 0     | 0     | 0    | 0    |
| Grade 2                 | 0          | 0             | 0             | 0             | 0            | 0               | 0               | 0               | 0              | 0    | 1       | 0     | 0     | 1     | 0    | 0    |
| Grade 3                 | 0          | 0             | 1             | 0             | 0            | 1               | 0               | 0               | 0              | 0    | 0       | 0     | 0     | 0     | 0    | 0    |
| Post-dose 2             |            |               |               |               |              |                 |                 |                 |                |      |         |       |       |       |      |      |
| Redness & bruising      |            |               |               |               |              |                 |                 |                 |                |      |         |       |       |       |      |      |
| All                     | 4          | 0             | 1             | 3             | 0            | 0               | 0               | 3               | 0              | 0    | 4       | 1     | 3     | 2     | 0    | 3    |
| Grade 1                 | 1          | 0             | 1             | 3             | 0            | 1               | 0               | 3               | 0              | 0    | 4       | 1     | 3     | 2     | 0    | 1    |
| Grade 2                 | 0          | 0             | 0             | 0             | 0            | 0               | 0               | 0               | 0              | 0    | 0       | 0     | 0     | 0     | 0    | 0    |
| Grade 3                 | 3          | 0             | 0             | 0             | 0            | 0               | 0               | 0               | 0              | 0    | 0       | 0     | 0     | 0     | 0    | 2    |
| Induration              |            |               |               |               |              |                 |                 |                 |                |      |         |       |       |       |      |      |
| All                     | 0          | 0             | 0             | 0             | 3            | 0               | 0               | 0               | 0              | 0    | 4       | 10    | 3     | 8     | 3    | 3    |
| Grade 1                 | 0          | 0             | 0             | 0             | 0            | 0               | 0               | 0               | 0              | 0    | 0       | 0     | 0     | 0     | 0    | 0    |
| Grade 2                 | 0          | 0             | 0             | 0             | 3            | 0               | 0               | 0               | 0              | 0    | 3       | 1     | 1     | 5     | 2    | 3    |
| Grade 3                 | 0          | 0             | 0             | 0             | 0            | 0               | 0               | 0               | 0              | 0    | 1       | 9     | 2     | 3     | 1    | 0    |
| Swelling                |            |               |               |               |              |                 |                 |                 |                |      |         |       |       |       |      |      |
| All                     | 0          | 0             | 0             | 0             | 0            | 0               | 0               | 0               | 0              | 0    | 0       | 1     | 0     | 0     | 0    | 0    |
| Grade 1                 | 0          | 0             | 0             | 0             | 0            | 0               | 0               | 0               | 0              | 0    | 0       | 1     | 0     | 0     | 0    | 0    |
| Grade 2                 | 0          | 0             | 0             | 0             | 0            | 0               | 0               | 0               | 0              | 0    | 0       | 0     | 0     | 0     | 0    | 0    |
| Grade 3                 | 0          | 0             | 0             | 0             | 0            | 0               | 0               | 0               | 0              | 0    | 0       | 0     | 0     | 0     | 0    | 0    |
| Systemic                |            |               |               |               |              |                 |                 |                 |                |      |         |       |       |       |      |      |
| Pre-vaccination         |            |               |               |               |              |                 |                 |                 |                |      |         |       |       |       |      |      |
| All                     | 1          | 1             | 0             | 3             | 1            | 0               | 1               | 9               | 5              | 0    | 25      | 31    | 22    | 36    | 39   | 28   |
| Grade 1                 | 1          | 1             | 0             | 3             | 1            | 0               | 1               | 9               | 5              | 0    | 23      | 26    | 15    | 22    | 32   | 27   |
| Grade 2                 | 0          | 0             | 0             | 0             | 0            | 0               | 0               | 0               | 0              | 0    | 2       | 5     | 6     | 11    | 6    | 1    |
| Grade 3                 | 0          | 0             | 0             | 0             | 0            | 0               | 0               | 0               | 0              | 0    | 0       | 0     | 1     | 3     | 1    | 0    |
| Post-dose 1             |            |               |               |               |              |                 |                 |                 |                |      |         |       |       |       |      |      |
| All                     | 11         | 1             | 0             | 7             | 2            | 1               | 1               | 5               | 10             | 2    | 35      | 50    | 39    | 52    | 37   | 38   |
| Grade 1                 | 8          | 1             | 0             | 6             | 2            | 1               | 1               | 5               | 7              | 2    | 18      | 26    | 22    | 27    | 20   | 15   |
| Grade 2                 | 2          | 0             | 0             | 1             | 0            | 0               | 0               | 0               | 1              | 0    | 9       | 15    | 7     | 16    | 9    | 13   |
| Grade 3                 | 1          | 0             | 0             | 0             | 0            | 0               | 0               | 0               | 2              | 0    | 8       | 9     | 10    | 9     | 8    | 10   |

(continued)

SUPPLEMENTAL TABLE 1  
Continued

| Group       | Study 1     |            |                |                |                |               |                  |                  |                  |                 | Study 2 |       |       |       |       |      |     |
|-------------|-------------|------------|----------------|----------------|----------------|---------------|------------------|------------------|------------------|-----------------|---------|-------|-------|-------|-------|------|-----|
|             | 2 µg + Alum | 2 µg + PBS | 0.5 µg + AS01E | 0.5 µg + AS03A | 0.5 µg + AS04D | 0.5 µg + Alum | 0.125 µg + AS01E | 0.125 µg + AS03A | 0.125 µg + AS04D | 0.125 µg + Alum | PBS     | AS01E | AS03A | AS03B | AS03C | Alum | PBS |
| Post-dose 2 |             |            |                |                |                |               |                  |                  |                  |                 |         |       |       |       |       |      |     |
| All         | 11          | 6          | 1              | 7              | 1              | 3             | 2                | 4                | 8                | 6               | 3       | 33    | 33    | 35    | 40    | 34   | 49  |
| Grade 1     | 6           | 4          | 0              | 5              | 1              | 3             | 2                | 4                | 8                | 6               | 3       | 11    | 18    | 13    | 21    | 14   | 21  |
| Grade 2     | 1           | 2          | 0              | 2              | 0              | 0             | 0                | 0                | 0                | 0               | 0       | 16    | 13    | 13    | 10    | 10   | 16  |
| Grade 3     | 4           | 0          | 1              | 0              | 0              | 0             | 0                | 0                | 0                | 0               | 0       | 6     | 2     | 9     | 9     | 10   | 12  |

Incidence is expressed as the total number of events per group measured daily during days 0–3 post-vaccination for local reactivity: 0 = Absence/no evidence of skin redness, bruising, swelling, induration, or any lesion. Redness: grade 1 = mild (pink skin); grade 2 = moderate (red skin); grade 3 = severe (dark red skin). Bruising: grade 1 = bruise < 5 mm; grade 2 = bruise 5–10 mm; grade 3 = bruise > 10 mm. Muscle induration: grade 1 = mild, hardened area with diameter < 5 mm; grade 2 = moderate, hardened area with diameter 5–10 mm; grade 3 = severe, whole area is hardened and obviously enlarged with diameter > 10 mm. Swelling: grade 1 = slightly swollen/larger compared with the unvaccinated leg, affected area < 5 mm; grade 2 = markedly swollen/larger compared with the unvaccinated leg, affected area 5–10 mm; grade 3 = obviously swollen/larger compared with the unvaccinated leg, affected area > 10 mm. Incidence is expressed as the total number of events per group measured daily during days (–7) to (–1) before vaccination and during days 0–7 post-vaccination for systemic reactivity. Grade 1 = mildly reduced appetite; grade 2 = moderately reduced appetite; grade 3 = severely reduced appetite/anorexia.

SUPPLEMENTAL TABLE 2

Post-challenge viremia, RNAemia and Nab responses for individual monkeys immunized with adjuvanted TDENV PIV formulations

| Group/monkey ID               | Challenge virus | Viremia max titer*<br>(log CCID <sub>50</sub> /mL) | RNAemia max titer†<br>(GEO/mL) | NAb titers     |        |                 |         |                      |        |
|-------------------------------|-----------------|----------------------------------------------------|--------------------------------|----------------|--------|-----------------|---------|----------------------|--------|
|                               |                 |                                                    |                                | Pre-challenge‡ |        | Post-challenge‡ |         | Post-/pre-challenge§ |        |
|                               |                 |                                                    |                                | DENV-1         | DENV-2 | DENV-1          | DENV-2  | DENV-1               | DENV-2 |
| TDENV PIV + AS01 <sub>E</sub> |                 |                                                    |                                |                |        |                 |         |                      |        |
| R105                          | DENV-1          | nd                                                 | 9,210                          | 20             | 45     | 10,606          | 8,504   | 530                  | 189    |
| R252                          | DENV-1          | nd                                                 | 42,900                         | 66             | 434    | 7,654           | 4,551   | 116                  | 11     |
| R431                          | DENV-1          | nd                                                 | 6,340                          | 77             | 399    | 10,178          | 9,766   | 132                  | 25     |
| R450                          | DENV-1          | nd                                                 | 4,460                          | 120            | 249    | 10,778          | 3,085   | 90                   | 12     |
| R525                          | DENV-1          | nd                                                 | 18,400                         | 79             | 1,379  | 15,576          | 9,441   | 197                  | 7      |
| TDENV PIV + AS03 <sub>A</sub> |                 |                                                    |                                |                |        |                 |         |                      |        |
| R143                          | DENV-1          | nd                                                 | 1,830                          | 106            | 402    | 22,784          | 6,657   | 215                  | 17     |
| R259                          | DENV-1          | nd                                                 | 39,000                         | 95             | 260    | 8,160           | 5,827   | 86                   | 22     |
| R330                          | DENV-1          | < 1.0                                              | 420                            | 198            | 954    | 3,754           | 3,388   | 19                   | 4      |
| R336                          | DENV-1          | nd                                                 | 171                            | 669            | 3,094  | 3,282           | 1,850   | 5                    | 1      |
| R546                          | DENV-1          | nd                                                 | 12,600                         | 267            | 1,289  | 41,312          | 9,466   | 155                  | 7      |
| TDENV PIV + AS03 <sub>B</sub> |                 |                                                    |                                |                |        |                 |         |                      |        |
| R111                          | DENV-1          | nd                                                 | 1,260                          | 216            | 572    | 35,535          | 7,711   | 165                  | 14     |
| R323                          | DENV-1          | nd                                                 | 129                            | 65             | 169    | 3,536           | 1,047   | 54                   | 6      |
| R447                          | DENV-1          | nd                                                 | 1,040                          | 148            | 284    | 9,651           | 5,024   | 65                   | 18     |
| R453                          | DENV-1          | nd                                                 | 2,910                          | 189            | 369    | 53,075          | 49,321  | 281                  | 134    |
| R608                          | DENV-1          | nd                                                 | 15,300                         | 151            | 892    | 19,542          | 7,218   | 129                  | 8      |
| TDENV PIV + AS03 <sub>C</sub> |                 |                                                    |                                |                |        |                 |         |                      |        |
| R234                          | DENV-1          | nd                                                 | 226,000                        | 48             | 173    | 18,294          | 901     | 381                  | 5      |
| R249                          | DENV-1          | nd                                                 | 5,730                          | 49             | 57     | 4,586           | 4,094   | 94                   | 72     |
| R255                          | DENV-1          | nd                                                 | 170,000                        | 46             | 306    | 11,494          | 9,160   | 250                  | 30     |
| R528                          | DENV-1          | nd                                                 | 2,680                          | 5              | 24     | 12,307          | 5,252   | 2,461                | 219    |
| R601                          | DENV-1          | nd                                                 | 5,710                          | 256            | 562    | 38,151          | 29,337  | 149                  | 52     |
| TDENV PIV + Alum              |                 |                                                    |                                |                |        |                 |         |                      |        |
| R207                          | DENV-1          | nd                                                 | 5,980                          | 60             | 86     | 29,137          | 4,517   | 486                  | 53     |
| R253                          | DENV-1          | nd                                                 | 5,720                          | 151            | 2,626  | 20,406          | 11,677  | 135                  | 4      |
| R413                          | DENV-1          | nd                                                 | 14,300                         | 87             | 97     | 17,377          | 8,554   | 200                  | 88     |
| R415                          | DENV-1          | nd                                                 | 115,000                        | 74             | 207    | 8,536           | 4,975   | 115                  | 24     |
| R538                          | DENV-1          | < 1.0                                              | 187,000                        | 41             | 15     | 3,508           | 4,228   | 86                   | 282    |
| PBS                           |                 |                                                    |                                |                |        |                 |         |                      |        |
| R451                          | DENV-1          | 1.7                                                | 4,250                          | 5              | 5      | 570             | 29      | 114                  | 6      |
| R452                          | DENV-1          | 1.4                                                | 2,720                          | 5              | 5      | 563             | 28      | 113                  | 6      |
| R501                          | DENV-1          | 1.4                                                | 1,050                          | 5              | 5      | 449             | 240     | 90                   | 48     |
| R514                          | DENV-1          | < 1.0                                              | 1,670                          | 5              | 5      | 967             | 159     | 193                  | 32     |
| R522                          | DENV-1          | 1.6                                                | 3,500                          | 5              | 5      | 16,530          | 4,618   | 3,306                | 924    |
| TDENV PIV + AS01 <sub>E</sub> |                 |                                                    |                                |                |        |                 |         |                      |        |
| R303                          | DENV-2          | nd                                                 | 419,000                        | 132            | 446    | 17,000          | 54,392  | 129                  | 122    |
| R316                          | DENV-2          | nd                                                 | 4,390                          | 67             | 111    | 9,417           | 33,722  | 141                  | 304    |
| R502                          | DENV-2          | nd                                                 | 143,000                        | 209            | 230    | 39,693          | 146,744 | 190                  | 638    |
| R512                          | DENV-2          | nd                                                 | 2,610                          | 134            | 664    | 4,750           | 31,961  | 35                   | 48     |
| R602                          | DENV-2          | nd                                                 | 7,360                          | 171            | 164    | 8,011           | 64,444  | 47                   | 393    |
| TDENV PIV + AS03 <sub>A</sub> |                 |                                                    |                                |                |        |                 |         |                      |        |
| R310                          | DENV-2          | nd                                                 | 3,320                          | 214            | 369    | 16,249          | 41,962  | 76                   | 114    |
| R324                          | DENV-2          | nd                                                 | 6,170                          | 232            | 440    | 12,056          | 71,922  | 52                   | 164    |
| R438                          | DENV-2          | nd                                                 | 0                              | 273            | 696    | 23,836          | 121,287 | 87                   | 174    |
| R520                          | DENV-2          | nd                                                 | 1,080                          | 1,025          | 791    | 6,926           | 179,960 | 7                    | 228    |
| R604                          | DENV-2          | nd                                                 | 10,500                         | 133            | 242    | 11,310          | 6,8267  | 85                   | 282    |
| TDENV PIV + AS03 <sub>B</sub> |                 |                                                    |                                |                |        |                 |         |                      |        |
| R322                          | DENV-2          | nd                                                 | 12,500                         | 22             | 63     | 5,695           | 31,457  | 259                  | 499    |
| R401                          | DENV-2          | nd                                                 | 880                            | 127            | 206    | 16,270          | 62,194  | 128                  | 302    |
| R421                          | DENV-2          | nd                                                 | 14,600                         | 491            | 397    | 13,615          | 218,474 | 28                   | 550    |
| R513                          | DENV-2          | nd                                                 | 2,390                          | 488            | 461    | 49,750          | 58,048  | 102                  | 126    |
| R517                          | DENV-2          | nd                                                 | 56,200                         | 166            | 244    | 9,867           | 53,588  | 59                   | 220    |
| TDENV PIV + AS03 <sub>C</sub> |                 |                                                    |                                |                |        |                 |         |                      |        |
| R251                          | DENV-2          | nd                                                 | 1,340                          | 98             | 140    | 30,612          | 57,741  | 312                  | 412    |
| R311                          | DENV-2          | nd                                                 | 1.11E+06                       | 17             | 34     | 12,163          | 32,007  | 716                  | 941    |
| R314                          | DENV-2          | nd                                                 | 1,770                          | 168            | 417    | 14,679          | 24,410  | 87                   | 59     |
| R509                          | DENV-2          | nd                                                 | 9,830                          | 378            | 1,461  | 7,740           | 45,658  | 21                   | 31     |
| R539                          | DENV-2          | nd                                                 | 75,400                         | 151            | 149    | 10,910          | 70,419  | 72                   | 473    |
| TDENV PIV + Alum              |                 |                                                    |                                |                |        |                 |         |                      |        |
| R250                          | DENV-2          | nd                                                 | 18,400                         | 912            | 716    | 7,523           | 26,517  | 8                    | 37     |
| R301                          | DENV-2          | nd                                                 | 390                            | 135            | 251    | 17,194          | 62,772  | 127                  | 250    |
| R312                          | DENV-2          | nd                                                 | 86,400                         | 128            | 64     | 6,795           | 17,281  | 53                   | 270    |
| R510                          | DENV-2          | nd                                                 | 1,320                          | 22             | 59     | 4,922           | 43,514  | 224                  | 738    |
| R527                          | DENV-2          | nd                                                 | 0                              | 179            | 250    | 3,206           | 19,472  | 18                   | 78     |

(continued)

SUPPLEMENTAL TABLE 2  
Continued

| Group/monkey ID | Challenge virus | Viremia max titer*<br>(log CCID <sub>50</sub> /mL) | RNAemia max titer†<br>(GEO/mL) | NAbs titers    |        |                 |        |                      |        |
|-----------------|-----------------|----------------------------------------------------|--------------------------------|----------------|--------|-----------------|--------|----------------------|--------|
|                 |                 |                                                    |                                | Pre-challenge‡ |        | Post-challenge‡ |        | Post-/pre-challenge§ |        |
|                 |                 |                                                    |                                | DENV-1         | DENV-2 | DENV-1          | DENV-2 | DENV-1               | DENV-2 |
| PBS             |                 |                                                    |                                |                |        |                 |        |                      |        |
| R114            | DENV-2          | 3.2                                                | 89,600                         | 5              | 5      | 152             | 2,413  | 30                   | 483    |
| R305            | DENV-2          | 2.8                                                | 101,000                        | 5              | 5      | 244             | 7,844  | 49                   | 1,569  |
| R506            | DENV-2          | 1.5                                                | 10,300                         | 5              | 5      | 145             | 2,900  | 29                   | 580    |
| R526            | DENV-2          | 2.7                                                | 72,600                         | 5              | 5      | 117             | 1,850  | 23                   | 370    |
| R603            | DENV-2          | 2.7                                                | 85,800                         | 5              | 5      | 128             | 2,937  | 26                   | 587    |

GEO = genome equivalent; nd = non-detectable viremia.

\*Maximum titer denotes highest viremia titer over the 14 days post-challenge (days 309–322 and days 253–266 for DENV-1 and DENV-2 challenge, respectively) expressed in log<sub>10</sub> of the 50% cell culture infective dose (CCID<sub>50</sub>) per 1 mL. < 1.0 = result below the limit of quantitation of 1.0 log<sub>10</sub> CCID<sub>50</sub>/mL.

†Maximum RNAemia titers measured over the 14 days post-challenge.

‡Pre-challenge samples were taken at the days of challenge with DENV-1 (day 308) or DENV-2 (day 252). Post-challenge samples were taken on day 336 for DENV-1 challenge and day 280 for DENV-2 challenge.

§Fold boost in NAbs titers after challenge.
